# Supplementary material for: Hermetia illucens in diets for zebrafish (Danio rerio): A study of bacterial diversity by using PCR-DGGE and metagenomic sequencing
Source: PubMed Central journal article supplement (PMC6903733; doi:10.1371/journal.pone.0225956), 2019-12-10

**S1 Fig.** Raw original image of bacterial DGGE profiles of the DNA extracted directly from the analysed samples and amplified with primers 338fGC and 518r

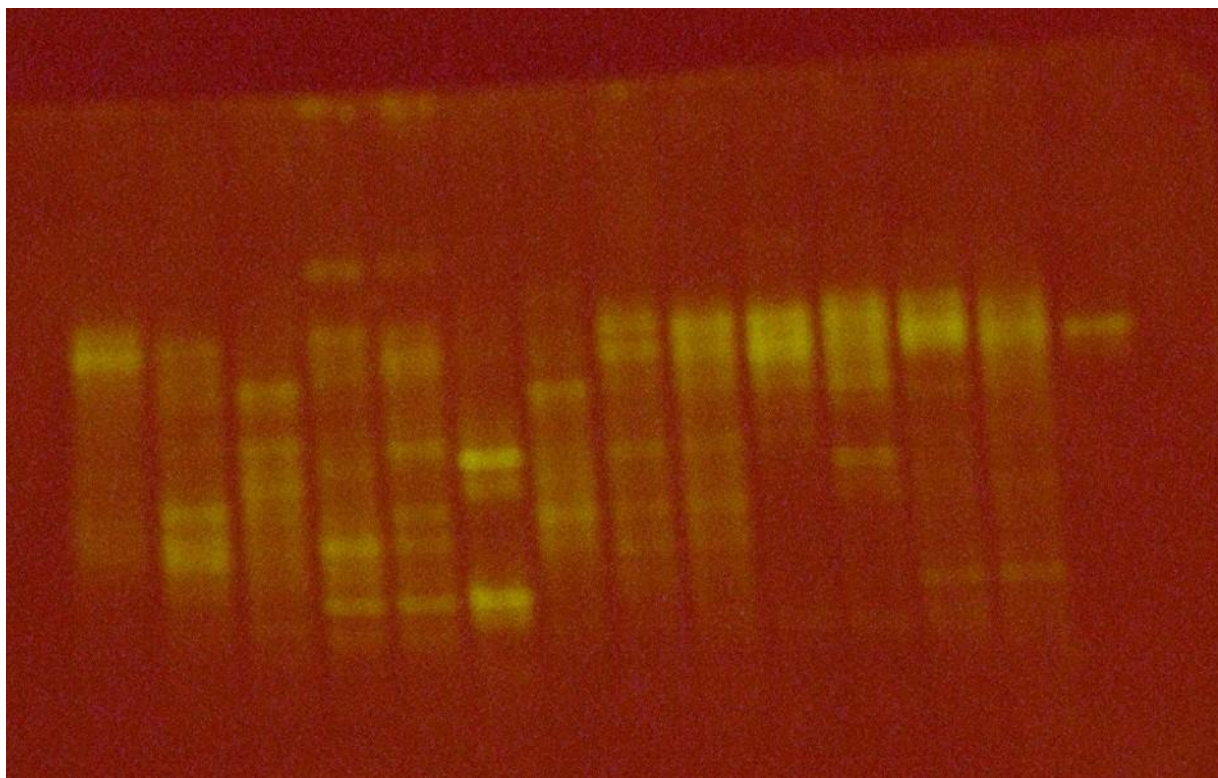

Supplement: pone.0225956.s003.pdf [file pone.0225956.s003.pdf]
